# Supplementary material for: Upregulation of DNA repair genes and cell extrusion underpin the remarkable radiation resistance of Trichoplax adhaerens
Source: PLoS Biol. 2021 Nov 17;19(11):e3001471. doi: 10.1371/journal.pbio.3001471 (PMC8635375; doi:10.1371/journal.pbio.3001471)
Supplement: S5 Data — (XLSX) [file pbio.3001471.s013.xlsx]

## Sheet: S5 Data
		Control	Control	Control	Control	Control	X-ray exposed	X-ray exposed	X-ray exposed	X-ray exposed	X-ray exposed
Replica	Gene	2h	6h	12h	24h	48h	2h	6h	12h	24h	48h
1	TP53	23.1	22.46	21.82	22.44	22.15	22.85	22.1	22.33	22.91	22.98
1	TP53	22.86	22.4	21.97	22.5	21.99	22.8	22.17	21.96	22.7	22.89
1	TP53	22.91	22.52	21.97	22.35	21.97	22.89	22.1	22.15	22.67	22.99
1	GAPDH	19.34	18.78	18.49	19.39	19.12	19.14	18.81	19.09	19.39	19.76
1	GAPDH	19.3	18.88	18.5	19.43	19.09	18.99	18.66	19.09	19.44	19.68
1	GAPDH	19.47	18.83	18.55	19.45	19.01	19.14	18.79	19.15	19.43	19.84
1	MDM2	23.69	23.47	23.05	21.92	23.21	20.03	20.63	21.59	23.62	22.51
1	MDM2	23.72	23.48	23.05	22	23.46	20.13	20.7	21.72	23.71	22.51
1	MDM2	23.79	23.38	23.29	21.96	23.23	20.01	20.67	21.72	23.7	22.48
2	TP53	23.95	23.32	23.82	23.93	23.78	24.27	23.51	23.85	23.9	24.58
2	TP53	23.93	23.64	23.64	23.43	23.83	24.05	23.41	23.77	23.82	24.54
2	TP53	23.8	23.83	23.75	23.57	23.71	24.05	23.45	23.81	23.82	24.2
2	GAPDH	19.97	20.42	20.36	20.36	20.48	20.43	19.93	20.44	20.58	21.58
2	GAPDH	20.03	20.35	20.08	20.45	20.58	20.45	19.96	20.41	20.55	21.21
2	GAPDH	20.09	20.4	20.6	20.25	20.63	20.42	19.93	20.38	20.6	21.49
2	MDM2	25.22	24.62	25	25.41	24.83	21.89	22.68	23.94	23.6	25.07
2	MDM2	25.06	25.14	25.14	25.11	24.73	21.87	22.67	23.84	23.74	24.93
2	MDM2	25.1	24.67	25.06	25.19	24.84	21.97	22.65	23.99	23.68	25.22
3	TP53	24.98	23.76	23.39	24.69	23.72	24.7	31.35	30.3	25.14	NA
3	TP53	23.32	23.66	23.43	24.67	23.6	24.59	31.77	30.61	24.68	NA
3	TP53	23.24	23.66	23.38	24.65	23.52	24.62	31.56	30.27	25.03	NA
3	GAPDH	19.75	20.31	20.07	21.05	20.4	20.7	NA	27.41	21.83	33.46
3	GAPDH	19.78	20.37	20.16	21.04	20.55	20.84	NA	27.44	21.89	32.29
3	GAPDH	19.77	20.24	20.17	20.88	20.43	20.77	NA	27.26	21.7	NA
3	MDM2	24.43	24.8	24.69	25.35	24.92	21.77	34.58	33.16	24.3	NA
3	MDM2	24.42	24.9	24.61	25.42	24.97	21.85	NA	31.59	24.23	NA
3	MDM2	24.91	24.84	24.53	25.51	24.94	22.04	34.45	32.09	23.97	NA
